# Supplementary material
Source: publisher figshare collection journal article supplement (https://karger.figshare.com/ndownloader/files/26505407)
Supplement: Supplementary file 1 [file 26505407]

Supplementary Table 1. Determinants of autonomy. Findings of multiple linear regression analysis

| Independent variables | Autonomy – Total sample | Autonomy – Women | Autonomy – Men |
| --- | --- | --- | --- |
| Frailty (CSHA Clinical Frailty Scale) | -0.34*** | -0.36*** | -0.28*** |
|  | (0.02) | (0.02) | (0.03) |
| Sex: - Female (Ref.: male) | 0.01 |  |  |
|  | (0.05) |  |  |
| Age | -0.03 | -0.07 | 0.07 |
|  | (0.01) | (0.01) | (0.01) |
| Marital status: - Married (Ref.: Single) | 0.07 | 0.06 | -0.02 |
|  | (0.09) | (0.12) | (0.27) |
| - Divorced | 0.05 | 0.06 | -0.10 |
|  | (0.10) | (0.12) | (0.29) |
| - Widowed | 0.16 | 0.08 | 0.23 |
|  | (0.06) | (0.09) | (0.07) |
| Living situation: being institutionalized (Ref.: not being institutionalized) | -0.09* | -0.11* | -0.02 |
|  | (0.08) | (0.09) | (0.13) |
| Educational level – middle education (Ref.: low education) | -0.06 | -0.06 | -0.04 |
|  | (0.05) | (0.05) | (0.08) |
| - high education | -0.02 | -0.04 | 0.03 |
|  | (0.06) | (0.08) | (0.08) |
| Social support (Lubben Social Network Scale) | -0.07+ | -0.04 | -0.14+ |
|  | (0.00) | (0.00) | (0.01) |
| Depressive symptoms (Geriatric Depression Scale) | -0.36*** | -0.32*** | -0.45*** |
|  | (0.01) | (0.01) | (0.02) |
| Cognitive impairment (Global Deterioration Scale) | -0.13** | -0.12* | -0.13* |
|  | (0.03) | (0.04) | (0.04) |
|  |  |  |  |
| Observations | 510 | 347 | 163 |
| R² | 0.41 | 0.43 | 0.45 |

Notes: Beta-coefficients (standardized) are displayed; robust standard errors in parentheses; *** p<0.001, ** p<0.01, * p<0.05, + p<0.10
